# Supplementary material for: Development and characterization of transgenic dominant male sterile rice toward an outcross-based breeding system
Source: PubMed Central journal article supplement — Breed Sci. 2018 Mar 24;68(2):248–57. doi: 10.1270/jsbbs.17090 (PMC5982183; doi:10.1270/jsbbs.17090), 2018-03-24
Supplement: 68_17090_1.pdf [file 68_17090_1.pdf]

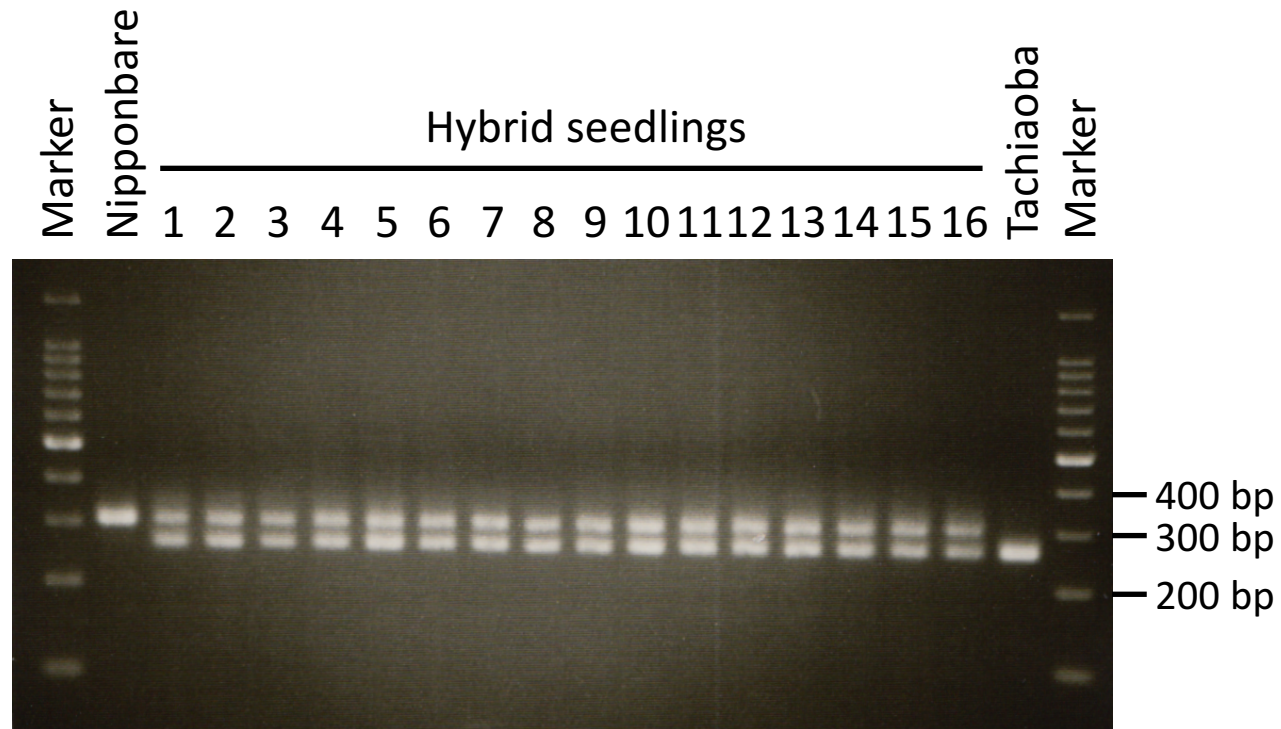

## Supplemental Fig. 1.

Parentage test of  $F_1$  seedlings from BMS10  $T_1$  individuals  $\times$  'Tachiaoba' by SSR marker.
