# Supplementary material for: Development and characterization of transgenic dominant male sterile rice toward an outcross-based breeding system
Source: PubMed Central journal article supplement — Breed Sci. 2018 Mar 24;68(2):248–57. doi: 10.1270/jsbbs.17090 (PMC5982183; doi:10.1270/jsbbs.17090), 2018-03-24
Supplement: 68_17090_2.pdf [file 68_17090_2.pdf]

**Supplemental Table 1.** List of the primers used in this study

| Name            | Sequence 5'-3'                        |
|-----------------|---------------------------------------|
| Barnase-F01     | GGGCGCGCCATGGTACCGGTTATCAACACGTTTGACG |
| Barnase-R01     | TGAGCTCTTATCTGATTTTTGTAAAGGTCTGATAAT  |
| int-Barnase-F01 | TAACTGCAGACATATCATAAGCTACCTGA         |
| int-Barnase-R01 | GAAATTTACCTGCAGATAATCCGCAACCC         |
| Barnase-int-F01 | TATCTGCAGGTAAATTTCTAGTTTTTCTC         |
| Barnase-int-R01 | ATGATATGTCTGCAGTTATCATCATCATAGAC      |
| UGU2            | CCGCAGCAGGGAGGCAAACAATGA              |
| 35S2-R01        | AAAAACTCGAGATCGGGGTCGTCCTCTCCAAATG    |
| Barstar orf-F01 | AACTCGAGCACCATGAAAAAAGCAGTCATTAACG    |
| Barstar R-BamHI | CCCGGATCCTTAAGAAAGTATGATGGTGATG       |
| s35Sp-PmeI-F    | GTTTAAACCGTCAACATGGTGGAGCACGA         |
| HPT-ApaI-R      | GGGCCCTATTCTTTGCCCTCGGAC              |
| HPT-F01         | CAAAGATCGTTATGTTTATCGGCACTTTG         |
| HPT-R01         | GAAGAAGATGTTGGCGACCTCGTATTG           |
| Barnase-F02     | CAAAGGGAACCTTGCAGAC                   |
| Barnase-R02     | CCGGTCTGAATTTCTGAAGC                  |
